# Supplementary material for: The effect of drought on dissolved organic carbon (DOC) release from peatland soil and vegetation sources
Source: Copernicus journal article supplement (doi:10.5194/bg-14-2891-2017), 2017-06-16
Supplement: Supplementary file 1 [file bg-14-2891-2017-supplement.zip]

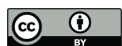

## *Supplement of*

# **The effect of drought on dissolved organic carbon (DOC) release from peatland soil and vegetation sources**

**Jonathan P. Ritson et al.**

*Correspondence to:* Jonathan P. Ritson ([j.ritson12@imperial.ac.uk](mailto:j.ritson12@imperial.ac.uk))

- [bg-14-2891-2017-supplement-title-page.pdf](#)
- [Ritson drought manuscript data.xlsx](#)

The copyright of individual parts of the supplement might differ from the CC BY 3.0 License.
