# Supplementary material for: The effect of drought on dissolved organic carbon (DOC) release from peatland soil and vegetation sources
Source: Copernicus journal article supplement (doi:10.5194/bg-14-2891-2017), 2017-06-16
Supplement: Supplementary file 1 [file Ritson drought manuscript data.xlsx]

## Sheet: Conditions
	Simulation conditions
		Monthly rainfall (mm)	equivalent ml
	Control	79	32.6
	Mild	51.5	21.2
	Medium	34.7	14.3
	Severe	23.3	9.6
		Temp Min	10.7	celcius
		Temp Max	18.9	celcius
		Temp Av	14.8	celcius
		Rainfall events per month	11
		Simulation length	6	weeks

## Sheet: Results
		DOC extracted	SUVA	Peak C	Peak T	Peak C/T	coagulation removal	SUVA removal	pH	Final water content
Source	Treatment	mg/g	mg/l/m				%	%		g
Peat	Control		3.19	0.25	0.09	2.91	43.03	88.55	5.85	18.659
Peat	Control	0.42	3.98	0.24	0.1	2.35	44.11	73.98	6.01	11.1433
Peat	Control	0.46	2.57	0.19	0.1	1.97	37.62	77.39	5.64	15.6178
Peat	Control	0.59	2.32	0.19	0.07	2.79	51.73	70.41	6	18.6742
Peat	Control	0.45	2.63	0.21	0.12	1.76	36.55	76.57	6	16.4533
Peat	Mild	0.67	2.35	0.2	0.12	1.72	10.17	81.05	5.88	14.569
Peat	Mild	0.72	2.57	0.22	0.14	1.52	61	90.67	5.75	13.8654
Peat	Mild	0.68	2.78	0.23	0.11	2.1	25.84	65.53	6.12	15.6425
Peat	Mild	0.66	3.16	0.3	0.09	3.3	45	83.6	6.16	12.8043
Peat	Mild	0.62	4.09	0.25	0.09	2.81	41.85	73.83	5.86	13.8312
Peat	Moderate	0.67	3.1	0.31	0.1	3.26	41.96	81.72	6.19	6.9475
Peat	Moderate	0.64	3.78	0.17	0.09	1.83	19.11	72.63	5.95	14.771
Peat	Moderate	0.65	3.29	0.31	0.11	2.82	42.48	84.08	6.1	20.8184
Peat	Moderate	0.64	3.98	0.21	0.07	2.95	19.01	67.91	6.01	21.0601
Peat	Moderate	0.46	2.38	0.23	0.11	2.11	26.75	62.38	6	11.9785
Peat	Severe	0.67	4.19	0.22	0.08	2.72	57.18	83.13	5.95	2.91892
Peat	Severe	0.45	3.09	0.19	0.08	2.34	42.45	78.76	5.76	7.43989
Peat	Severe	0.6	2.64	0.16	0.09	1.82	40.54	76.91	5.86	5.83824
Peat	Severe	0.49	2.17	0.19	0.1	1.91	27.37	61.53	5.94	1.44284
Peat	Severe	0.68	2.06	0.18	0.23	0.79	25.87	80.51	5.43	12.1218
Sphagnum	Control	2.48	1.54	0.19	0.28	0.69	15.24	60.72	6.11	32.3073
Sphagnum	Control	3.68	1	0.14	0.27	0.52	13.87	86.72	6.18	37.2674
Sphagnum	Control	4.25	0.83	0.16	0.23	0.71	10	70.09	6.03	29.5254
Sphagnum	Control	4.31	0.74	0.13	0.13	1.01	16.4	67.58	6.11	24.1398
Sphagnum	Control	1.96	1.25	0.2	0.31	0.66	8.47	76.51	6.22	29.0893
Sphagnum	Mild	4.89	2.19	0.22	0.16	1.32	19.24	81.66	6.08	18.8826
Sphagnum	Mild	2.37	0.7	0.21	0.23	0.9	34.59	72.36	6.07	22.5202
Sphagnum	Mild	2.04	0.95	0.21	0.25	0.83	40.81	59.96	6.29	17.9478
Sphagnum	Mild	2.3	0.96	0.22	0.28	0.78	36.82	67.02	6.32	16.4967
Sphagnum	Mild	3.66	0.83	0.16	0.21	0.76	31.93	60.47	6.18	12.4429
Sphagnum	Moderate	2.15	0.65	0.25	0.31	0.81	48.92	69.18	6.25	16.2172
Sphagnum	Moderate	4.82	2.24	0.16	0.3	0.53	13.71	90.95	5.95	10.4387
Sphagnum	Moderate	4.36	2.29	0.19	0.28	0.68	29.64	98.45	6.18	1.76779
Sphagnum	Moderate	4.86	2.24	0.22	0.37	0.59	21.62	97.17	6.17	1.01591
Sphagnum	Moderate	5.97	1.59	0.22	0.28	0.78	10.93	85.69	6.01	2.21673
Sphagnum	Severe	2.22	1.71	0.21	0.26	0.8	46.89	75.29	6.23	0.62047
Sphagnum	Severe	1.78	1.74	0.22	0.21	1.04	41.5	77.87	6.16	-0.310815
Sphagnum	Severe	5.42	0.69	0.21	0.22	0.95	22.14	81.65	6.08	0.296692
Sphagnum	Severe	2.09	1.64	0.21	0.34	0.61	20.34	77.12	6.17	0.228904
Sphagnum	Severe	3.73	1.19	0.21	0.34	0.61	36.57	70.04	6.03	0.846933
Juncus	Control	6.47	1.78	0.65	0.55	1.19	61.53	30.69	6.21
Juncus	Control	6.02	2.11	0.73	0.49	1.5	65.77	37.37	6.18
Juncus	Control	4.58	2.22	0.63	0.49	1.29	62.16	61.53	6.29
Juncus	Control	6.28	2.17	0.73	0.51	1.44	60.18	59.46	6.22
Juncus	Control	9.85	1.83	1.09	0.68	1.6	52.9	39.52	6.26
Juncus	Mild	10.85	1.57	0.61	0.51	1.18	61.21	15.42	6.38
Juncus	Mild	11.9	1.58	0.64	0.37	1.7	41.88	33.08	6.08
Juncus	Mild	8.09	1.99	0.62	0.28	2.19	61.19	35.67	6.22
Juncus	Mild	5.52	2.61	0.55	0.24	2.27	43.38	63.07	6.14
Juncus	Mild	8.57	1.99	0.59	0.33	1.8	62.9	56.35	6.15
Juncus	Moderate	12.46	2.01	0.96	0.66	1.46	35.66	53.83	6.19
Juncus	Moderate	11.57	2.09	0.9	0.53	1.69	61.05	26.19	6.2
Juncus	Moderate	12.21	2.02	1.07	0.7	1.54	55.83	50.62	6.24
Juncus	Moderate	9.22	2.04	0.86	0.55	1.56	43.78	51.76	6.11
Juncus	Moderate	8.66	2.28	0.85	0.53	1.61	61.5	51.07	6.11
Juncus	Severe	7.43	2.26	0.46	0.25	1.82	35.72	58.99	6.12
Juncus	Severe	14.37	1.76	0.59	0.42	1.4	40.86	54.06	6.02
Juncus	Severe	11.73	2.02	0.57	0.37	1.56	62.14	38.31	6.2
Juncus	Severe	7.04	2.46	0.5	0.27	1.88	58.51	46.51	6.04
Juncus	Severe	11.49	1.96	0.66	0.34	1.96	65.88	35.7	6.13
Calluna	Control	6.48	1.22	0.21	0.15	1.43	36.8	22.95	5.95
Calluna	Control	5.43	2.09	0.24	0.2	1.2	36.1	80.57	5.98
Calluna	Control	5.46	1.24	0.15	0.11	1.37	27.5	30.54	6.02
Calluna	Control	5.32	1.57	0.21	0.17	1.25	34.89	63.94	5.91
Calluna	Control	6.51	1.16	0.24	0.13	1.91	24.58	15.72	6.04
Calluna	Mild	8.84	1.54	0.22	0.17	1.27	46.57	20.83	6.1
Calluna	Mild	5.31	2.59	0.29	0.21	1.43	34.28	46.86	6.01
Calluna	Mild	8.05	2.42	0.32	0.35	0.9	40.42	76.04	5.92
Calluna	Mild	5.08	2.49	0.26	0.21	1.25	38.23	82.79	5.96
Calluna	Mild	6.25	1.13	0.17	0.12	1.37	28.23	42.4	5.96
Calluna	Moderate	8.33	1.72	0.19	0.14	1.34	37.53	66.75	6
Calluna	Moderate	9.05	1.25	0.21	0.16	1.29	33.18	12.69	5.94
Calluna	Moderate	9.62	0.87	0.2	0.15	1.39	31.53	23.89	6.03
Calluna	Moderate	5.45	2.56	0.28	0.22	1.25	18.27	82.52	5.99
Calluna	Moderate	6.5	2.1	0.2	0.2	0.98	34.65	70.86	5.97
Calluna	Severe	6.09	2.08	0.26	0.16	1.6	40.24	65.64	5.92
Calluna	Severe	8.51	0.74	0.19	0.12	1.62	20.66	45.67	6.02
Calluna	Severe	3.97	2.16	0.19	0.15	1.25	51.56	34.92	5.95
Calluna	Severe	8.4	0.98	0.27	0.14	1.88	52.99	40.51	5.98
Calluna	Severe	8.56	1.19	0.26	0.15	1.78	32.78	65.12	6.04
Molinia	Control	10.87	3.09	0.53	0.39	1.36	41.38	76.76	6.02
Molinia	Control	16.78	2.83	0.54	0.37	1.49	47.13	42.55	6.08
Molinia	Control	14.1	2.03	0.45	0.35	1.29	46.28	39.22	6.14
Molinia	Control	19.04	1.66	0.53	0.38	1.38	31.53	70.14	5.92
Molinia	Control	23.89	1.16	0.42	0.29	1.48	44.24	63.96	5.97
Molinia	Mild	28.68	1.23	0.52	0.31	1.64	29.72	32.53	5.92
Molinia	Mild	9.01	1.82	0.61	0.44	1.38	48.64	87.85	6.06
Molinia	Mild	20.27	1.67	0.49	0.34	1.43	50.28	45.8	6.06
Molinia	Mild	17.09	1.76	0.48	0.31	1.53	40.99	70.97	6.09
Molinia	Mild	24.28	1.57	0.57	0.36	1.56	13.2	64.07	5.99
Molinia	Moderate	12.8	3.48	0.35	0.24	1.48	44.86	86.5	5.93
Molinia	Moderate	17.3	2.89	0.33	0.23	1.44	41.63	66.98	6.05
Molinia	Moderate	16.29	2.97	0.37	0.26	1.43	42.17	34.43	6.13
Molinia	Moderate	13.21	3.64	0.33	0.17	1.97	19.97	90.06	6.02
Molinia	Moderate	11.24	7.49	0.52	0.36	1.45	36.28	92.35	5.98
Molinia	Severe	19.76	3.63	0.4	0.25	1.6	19.47	87.5	6.1
Molinia	Severe	11.77	3.6	0.42	0.47	0.9	49.83	80.48	6.04
Molinia	Severe	12.41	6.99	0.47	0.25	1.89	19.58	93.8	6.1
Molinia	Severe	20.02	2.68	0.42	0.22	1.94	36.16	44.9	5.95
Molinia	Severe	11.68	4.46	0.43	0.23	1.86	45.66	82.61	6.03
